# Supplementary material
Source: PubMed Central journal article supplement (PMC3993389)
Supplement: IAI.01443-13_zii999090575so1.pdf [file IAI.01443-13_zii999090575so1.pdf]

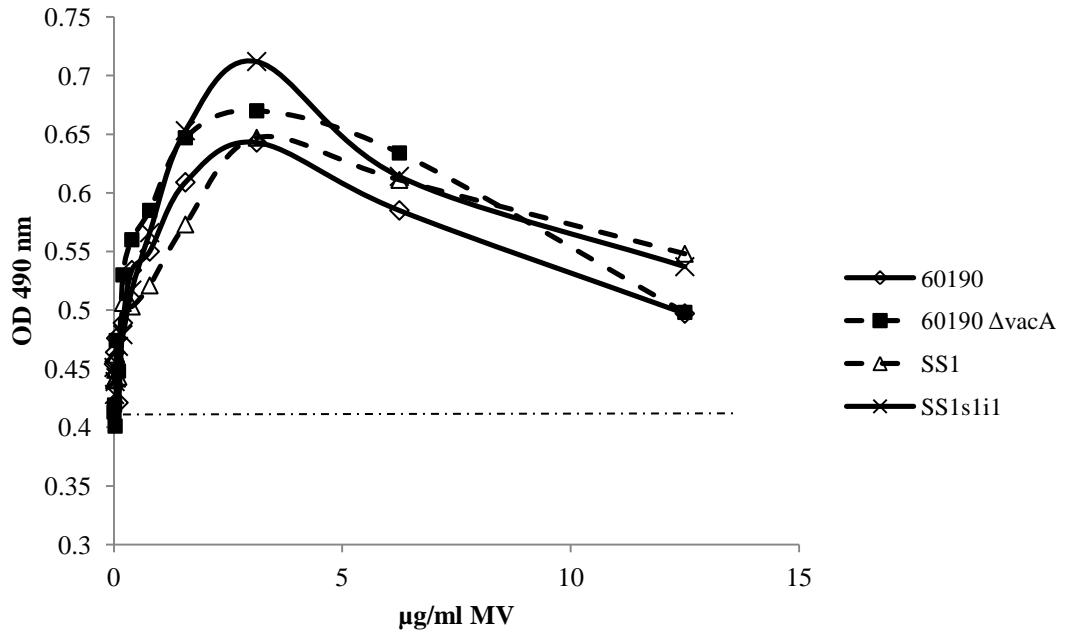

**Supplementary Figure 1: *H. pylori* MV stimulate proliferation of human PBMCs at sub-toxic doses.** Human PBMCs were incubated in the presence of 0-12.5 µg/ml *H. pylori* MV purified from the strains indicated. After 48 hours, the proliferative response to MV was measured using CellTiter Aqueous One reagent (each data point represents a single well). The OD<sub>490</sub> is directly proportional to the number of metabolically active cells per well. Dashed line = mean OD<sub>490</sub> for unstimulated (PBS control) cells.
